# Supplementary material
Source: PubMed Central journal article supplement (PMC11029443)
Supplement: 262_2015_1678_MOESM1_ESM.pdf [file 262_2015_1678_MOESM1_ESM.pdf]

Supplementary Figures and Tables

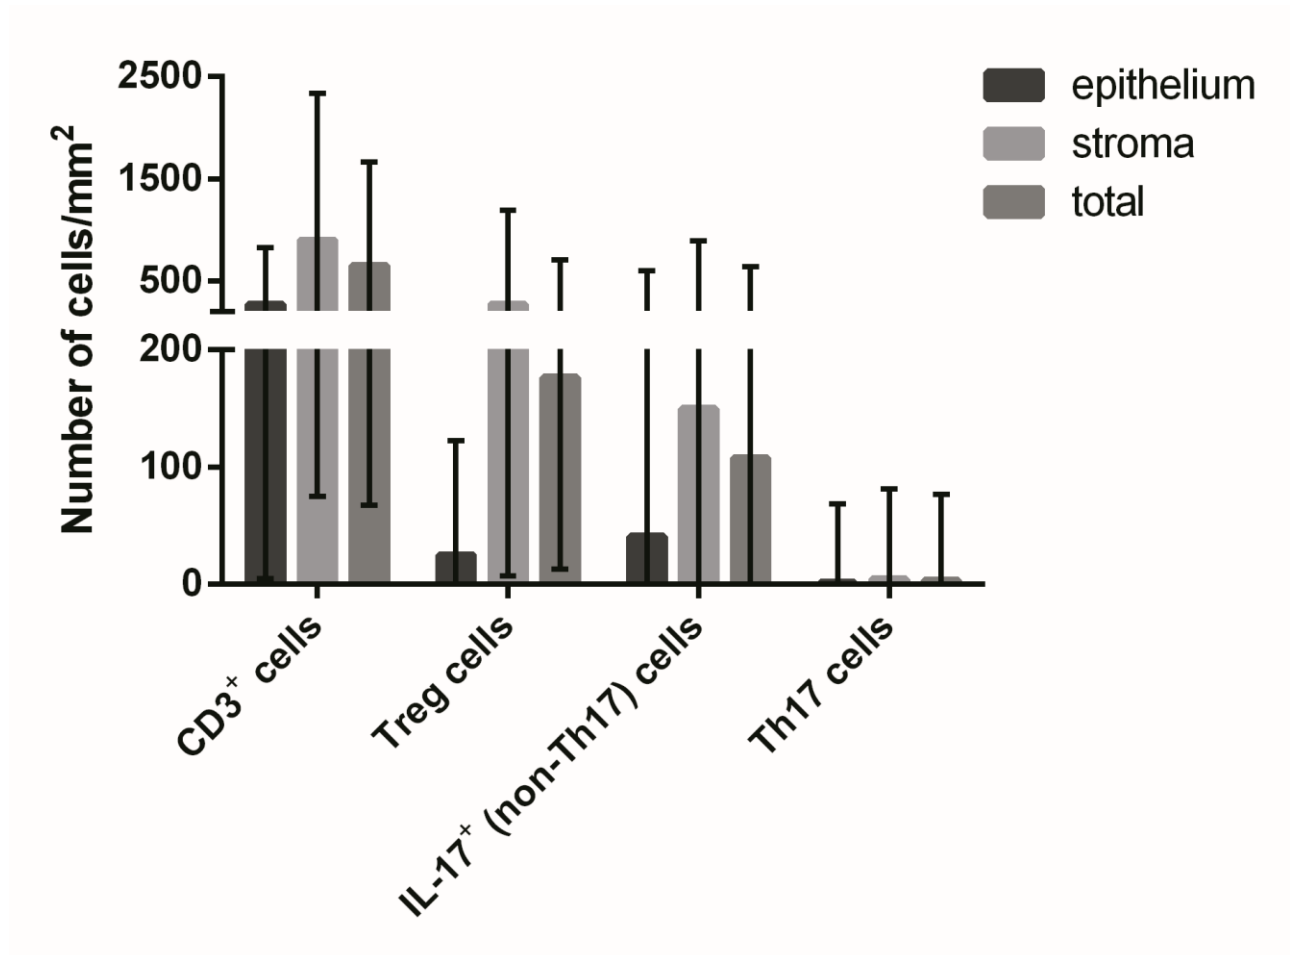

**Supplementary Figure 1. Quantification of tumor infiltrating cells**

The mean and range of the number of total CD3<sup>+</sup> T cells, FoxP3<sup>+</sup>CD3<sup>+</sup> Tregs, CD3<sup>+</sup>IL-17<sup>+</sup> cells and CD3<sup>+</sup>IL-17<sup>+</sup> Th17 cells observed infiltrating in the tumor epithelium, tumor stroma and combined total area per mm<sup>2</sup> is shown (n=67).

**Supplementary Table 1** Patient clinicopathological characteristics

| <b>Clinicopathological parameter</b>       | <b>Category</b> | <b>N = 67 (%)</b> |
|--------------------------------------------|-----------------|-------------------|
| <b>Age</b>                                 | Median          | 40                |
|                                            | Range           | 26-80             |
| <b>FIGO stage<sup>a</sup></b>              | IA              | 2 (3)             |
|                                            | IB              | 59 (88)           |
|                                            | IIA             | 6 (9)             |
| <b>TNM stage</b>                           | IAII            | 4 (6)             |
|                                            | IB1             | 40 (60)           |
|                                            | IB              | 4 (6)             |
|                                            | IB2             | 8 (12)            |
|                                            | IIA             | 7 (10)            |
|                                            | IIB             | 1 (1)             |
|                                            | IIIA            | 1 (1)             |
|                                            | IIIB            | 2 (3)             |
| <b>Lymph nodes</b>                         | negative        | 54 (81)           |
|                                            | positive        | 13 (19)           |
| <b>Tumor size (mm)<sup>b</sup></b>         | <40             | 52 (78)           |
|                                            | ≥40             | 12 (18)           |
| <b>Vaso-invasion<sup>b</sup></b>           | Absent          | 36 (54)           |
|                                            | Present         | 17 (25)           |
| <b>Infiltration depth (mm)<sup>b</sup></b> | <15             | 46 (69)           |
|                                            | ≥15             | 17 (25)           |
| <b>HPV type</b>                            | 16              | 26 (39)           |
|                                            | 18              | 24 (36)           |
|                                            | other           | 17 (25)           |

<sup>a</sup>FIGO, International Federation of Gynecologists and Obstetricians

<sup>b</sup>Data were not available for all patients.

**Supplementary Table 2** Number of T cells, Tregs and IL-17<sup>+</sup> cells present in cervical adenocarcinoma

|                   | CD3 <sup>+</sup> cells |        | Treg cells      |        | IL-17 <sup>+</sup><br>(non-Th17) cells |        | Th17 cells      |        |
|-------------------|------------------------|--------|-----------------|--------|----------------------------------------|--------|-----------------|--------|
|                   | mean<br>(range)        | median | mean<br>(range) | median | mean<br>(range)                        | median | mean<br>(range) | median |
| <b>Epithelium</b> | 268<br>(5-827)         | 187    | 25<br>(0-123)   | 17     | 41<br>(0-601)                          | 7      | 2<br>(0-69)     | 0      |
| <b>Stroma</b>     | 898<br>(75-2338)       | 762    | 271<br>(7-1193) | 175    | 150<br>(0-889)                         | 95     | 4<br>(0-82)     | 0      |
| <b>Total</b>      | 649<br>(68-1664)       | 601    | 176<br>(13-705) | 119    | 107<br>(0-642)                         | 69     | 3<br>(0-76)     | 0      |

The mean, minimum, maximum and median number of total CD3<sup>+</sup> cells, FoxP3<sup>+</sup>CD3<sup>+</sup> Tregs, CD3<sup>-</sup>IL-17<sup>+</sup> cells and CD3<sup>+</sup>IL-17<sup>+</sup> Th17 cells observed infiltrating in the tumor epithelium, tumor stroma and combined total area per mm<sup>2</sup> is indicated.

**Supplementary Table 3** Hazard ratio for Tregs in combination with IL-17<sup>+</sup> cells

| Variable              | Univariate Cox regression |         | Multivariate Cox regression |         |
|-----------------------|---------------------------|---------|-----------------------------|---------|
|                       | Hazard ratio (95% CI)     | p value | Hazard ratio (95% CI)       | p value |
| TNM stage             | 1.606 (1.133-2.276)       | 0.008   | 1.545 (1.051-2.273)         | 0.027   |
| Tregs high            | reference                 |         | reference                   |         |
| Tregs low, IL-17 high | 5.587 (0.506-61.635)      | 0.160   | 7.561 (0.659-86.742)        | 0.579   |
| Tregs low, IL-17 low  | 13.906 (1.671-115.730)    | 0.015   | 12.261 (1.454-103.383)      | 0.021   |

Univariate and multivariate Cox regression analyses for the TNM stage and a low number of Tregs combined with a high or low number of (non-Th17) IL-17<sup>+</sup> cells versus a high number of Tregs on disease-specific survival are shown.

**Supplementary Table 4** Hazard ratio for Tregs in combination with Th17 cells

| <b>Variable</b>         | <b>Univariate Cox regression</b> |         | <b>Multivariate Cox regression</b> |         |
|-------------------------|----------------------------------|---------|------------------------------------|---------|
|                         | Hazard ratio (95% CI)            | p value | Hazard ratio (95% CI)              | p value |
| TNM stage               | 1.606 (1.133-2.276)              | 0.008   | 1.619 (1.131-2.317)                | 0.008   |
| Tregs high              | reference                        |         | reference                          |         |
| Tregs low, Th17 absent  | 8.361 (0.934-74.863)             | 0.058   | 8.460 (0.942-75.983)               | 0.057   |
| Tregs low, Th17 present | 12.825 (1.431-114.930)           | 0.023   | 14.668 (1.603-134.179)             | 0.017   |

Univariate and multivariate Cox regression analyses for the TNM stage and a low Tregs number combined with a high or low number of Th17 cells versus a high number of Tregs on disease-specific survival are shown.
